# Supplementary material for: Membrane fusion by Drosophila atlastin does not require GTP hydrolysis
Source: PubMed Central journal article supplement — Mol Biol Cell. 2022 Nov 18;33(14):br23. doi: 10.1091/mbc.E22-05-0164 (PMC9727788; doi:10.1091/mbc.e22-05-0164), 2022-11-18
Supplement: mbc-33-br23-s001.pdf [file mbc-33-br23-s001.pdf]

Supplementary Materials

*Molecular Biology of the Cell*

Crosby and Lee

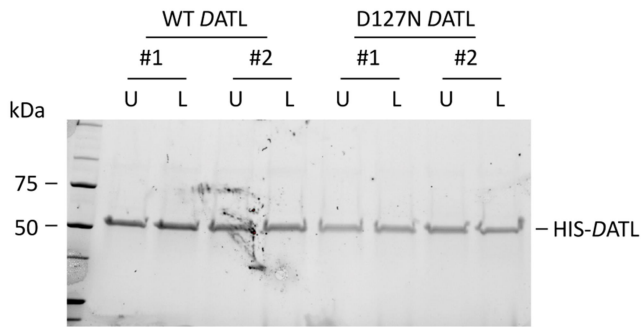

**Figure S1. Wild type and D127N HIS-*DATL* are incorporated into liposomes at similar efficiencies.** Two independent sets of *DATL* proteo-liposomes from 2 independent protein preps were resolved on SDS-PAGE. Unlabeled (U) and labeled (L) refers to the absence or presence of fluorescent lipids in the preformed vesicles.

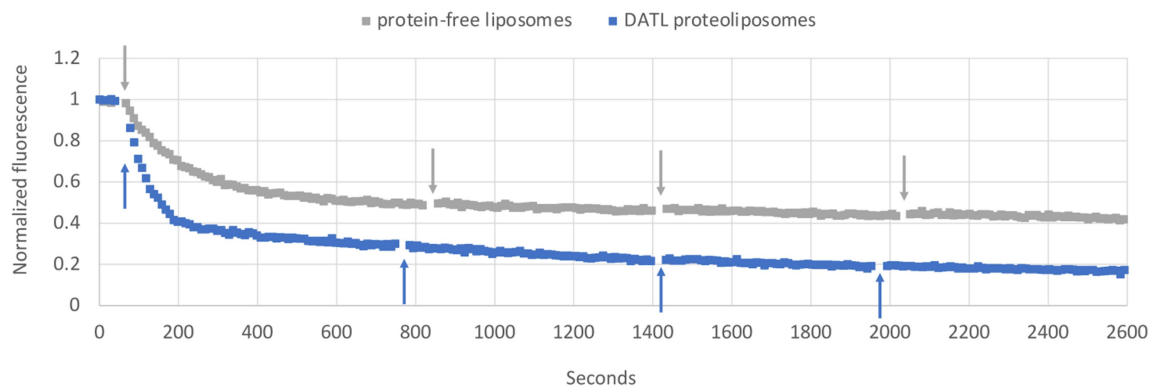

**Figure S2. Both protein-free and *DATL* proteo-liposomes retain NBD fluorescence after multiple rounds of quenching with membrane impermeant sodium dithionite.** Traces monitoring NBD fluorescence, normalized to the initial value, for protein-free or *DATL* proteo-liposomes over time at 37°C after 4 sequential additions of 2 mM (final concentration) fresh sodium dithionite at the times indicated by arrows.
